# Supplementary material for: An Insight into the Growing Concerns of Styrene Monomer and Poly(Styrene) Fragment Migration into Food and Drink Simulants from Poly(Styrene) Packaging
Source: MDPI journal article supplement (doi:10.3390/foods10051136), 2021-05-20
Supplement: s1 [file s1]

## Table of Contents 2

|                                                      |    |
|------------------------------------------------------|----|
| Nile red images .....                                | 2  |
| Table S1.....                                        | 2  |
| A: EPS polystyrene meat tray at 5°C .....            | 2  |
| B: EPS polystyrene take away at 5°C.....             | 3  |
| C: XPS polystyrene foam disposable plate at 5°C..... | 4  |
| Table S2.....                                        | 5  |
| A: EPS polystyrene meat tray at 60°C .....           | 5  |
| B: EPS polystyrene take away at 60°C.....            | 6  |
| C: XPS polystyrene disposable plate at 60°C.....     | 7  |
| Table S3.....                                        | 8  |
| A: EPS polystyrene meat tray at 70°C .....           | 8  |
| B: EPS polystyrene take away at 70°C.....            | 9  |
| C: XPS polystyrene disposable plate at 70°C.....     | 10 |
| Figure S2.....                                       | 12 |
| Figure S3.....                                       | 12 |
| Figure S4.....                                       | 12 |
| Figure S5a.....                                      | 13 |
| Figure S5b.....                                      | 13 |
| Figure S6a.....                                      | 14 |
| Figure S6b.....                                      | 14 |
| Figure S6c .....                                     | 15 |
| Figure S6d .....                                     | 15 |
| Figure S6e .....                                     | 16 |

## Nile Red Images

Table S1. Nile red staining indicative of plastic leaching in samples 5–7 tested after 10 days at 5 °C

A: EPS polystyrene meat tray at 5 °C.

|                |                                                                                    |                      |                                                                                     |
|----------------|------------------------------------------------------------------------------------|----------------------|-------------------------------------------------------------------------------------|
| 10%<br>Ethanol |   | 95%<br>Ethanol       |   |
| 50%<br>Ethanol |  | 3%<br>Acetic<br>Acid |  |

B: EPS polystyrene take away at 5 °C.

|                |                                                                                    |                      |                                                                                     |
|----------------|------------------------------------------------------------------------------------|----------------------|-------------------------------------------------------------------------------------|
| 10%<br>Ethanol | 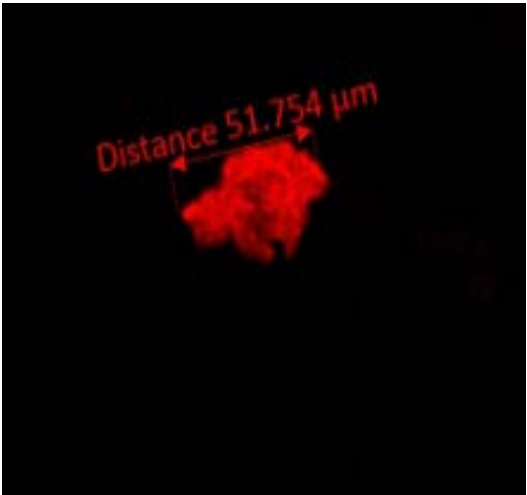  | 95%<br>Ethanol       |   |
| 50%<br>Ethanol |  | 3%<br>Acetic<br>Acid |  |

C: XPS polystyrene foam disposable plate at 5 °C

|                |                                                                                    |                   |                                                                                     |
|----------------|------------------------------------------------------------------------------------|-------------------|-------------------------------------------------------------------------------------|
| 10%<br>Ethanol |   | 95%<br>Ethanol    |   |
| 50%<br>Ethanol |  | 3% Acetic<br>Acid |  |

**Table S2.** Nile red staining indicative of plastic leaching in samples 5–7 tested after 2 hours at 60 °C

A: EPS polystyrene meat tray at 60 °C.

|             |                                                                                    |                |                                                                                     |
|-------------|------------------------------------------------------------------------------------|----------------|-------------------------------------------------------------------------------------|
| 10% Ethanol | 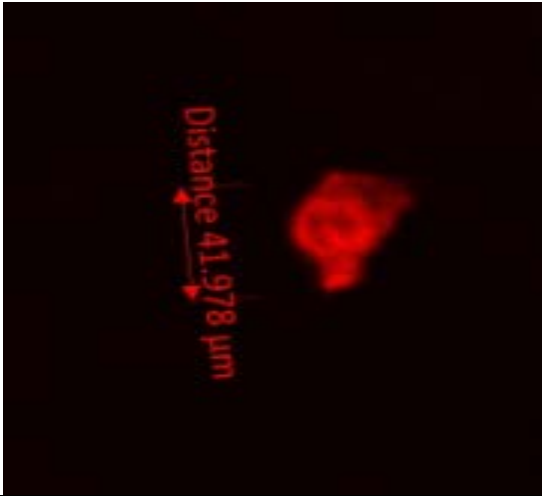  | 95% Ethanol    |   |
| 50% Ethanol |  | 3% Acetic Acid |  |

B: EPS polystyrene take away at 60°C

|             |                                                                                    |                |                                                                                     |
|-------------|------------------------------------------------------------------------------------|----------------|-------------------------------------------------------------------------------------|
| 10% Ethanol |   | 95% Ethanol    |   |
| 50% Ethanol |  | 3% Acetic Acid |  |

C: XPS polystyrene disposable plate at 60 °C.

|             |                                                                                     |                |                                                                                      |
|-------------|-------------------------------------------------------------------------------------|----------------|--------------------------------------------------------------------------------------|
| 10% Ethanol |    | 95% Ethanol    |    |
| 50% Ethanol |  | 3% Acetic Acid |  |

**Table S3.** Nile red staining indicative of plastic leaching in samples 5–7 tested after 10 days at 70 °C.

A: EPS polystyrene meat tray at 70 °C.

|             |                                                                                    |                |                                                                                     |
|-------------|------------------------------------------------------------------------------------|----------------|-------------------------------------------------------------------------------------|
| 10% Ethanol | 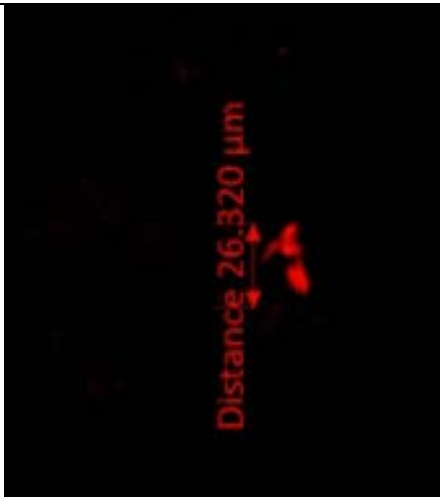  | 95% Ethanol    |   |
| 50% Ethanol |  | 3% Acetic Acid |  |



B: EPS polystyrene take away at 70 °C.

|             |                                                                                     |                |                                                                                      |
|-------------|-------------------------------------------------------------------------------------|----------------|--------------------------------------------------------------------------------------|
| 10% Ethanol | 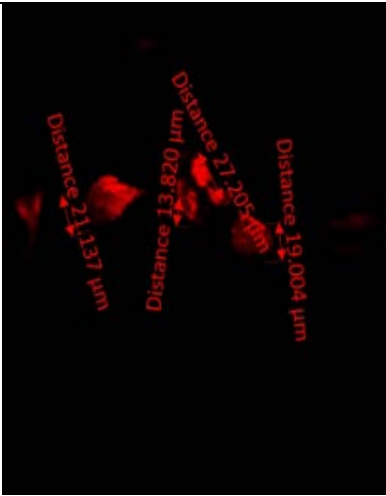   | 95% Ethanol    |    |
| 50% Ethanol |  | 3% Acetic Acid |  |

C: XPS polystyrene disposable plate at 70 °C.

|             |                                                                                    |                |                                                                                     |
|-------------|------------------------------------------------------------------------------------|----------------|-------------------------------------------------------------------------------------|
| 10% Ethanol | 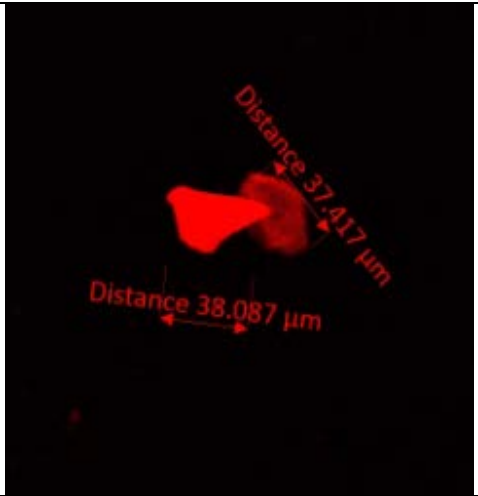  | 95% Ethanol    |   |
| 50% Ethanol |  | 3% Acetic Acid |  |

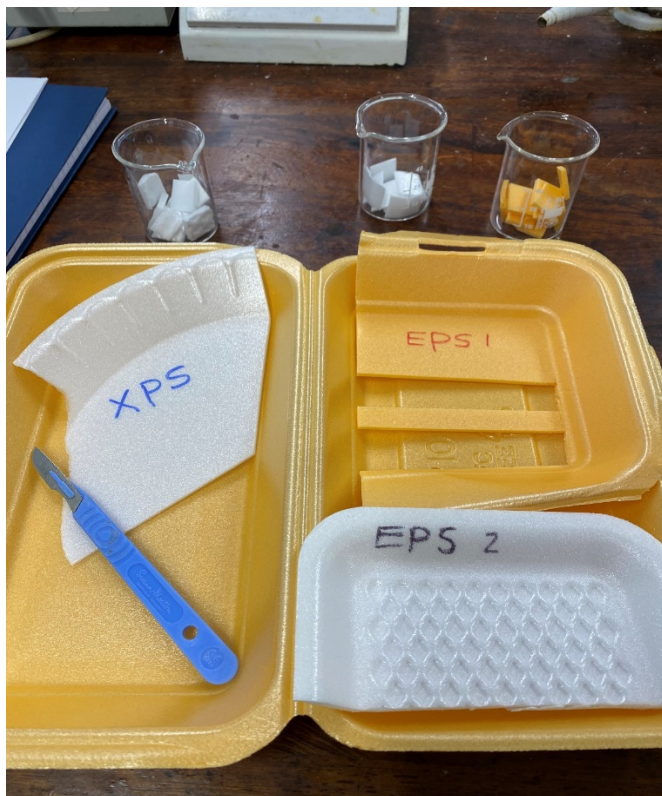

Cutting process of samples

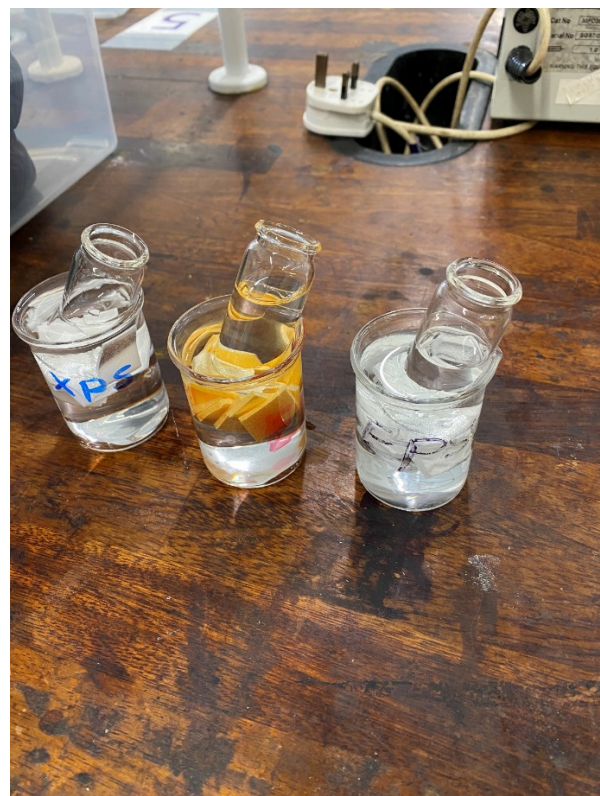

Control experiment

Figure S1. Control experiment.

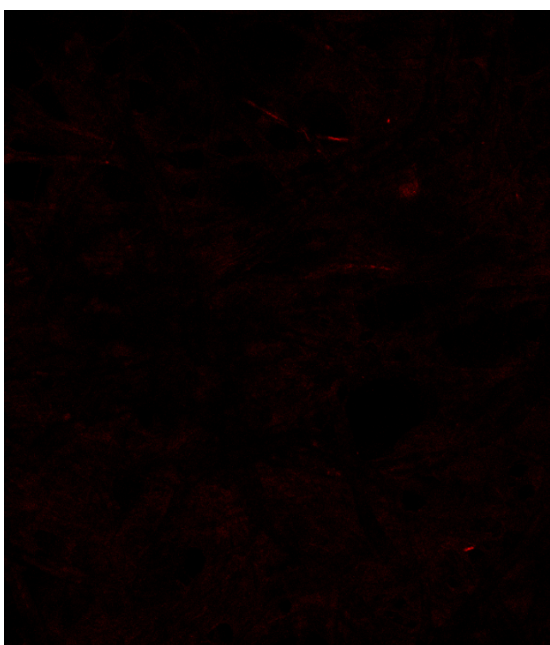

Image of polycarbonate track-etch membranes with Nile Red stain

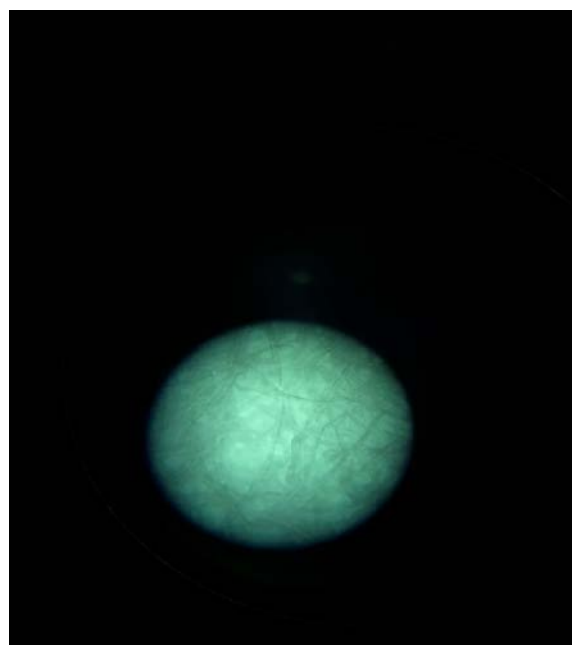

Image of polycarbonate track-etch membranes without Nile Red stain

Figure S2. Images of clear of PCTE membrane from the microplastics-control experiment using Axio Observer Z1/7 microscope with an EC Plan Neofluar 10 × 0.30 m27 objective lens at an emission of 636 nm and an excitation of 559 nm; using an LSM800 MA Pmt2 imaging device.

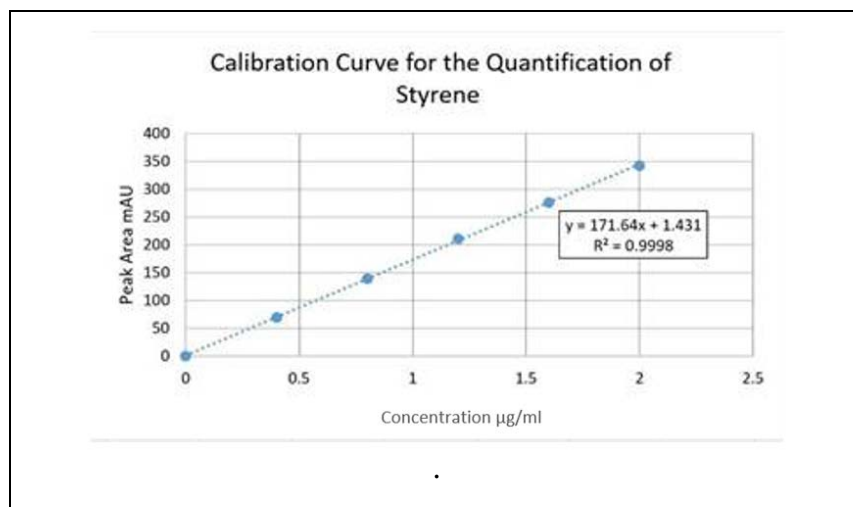

Figure S3. Calibration curve for styrene 0–2µg/mL.

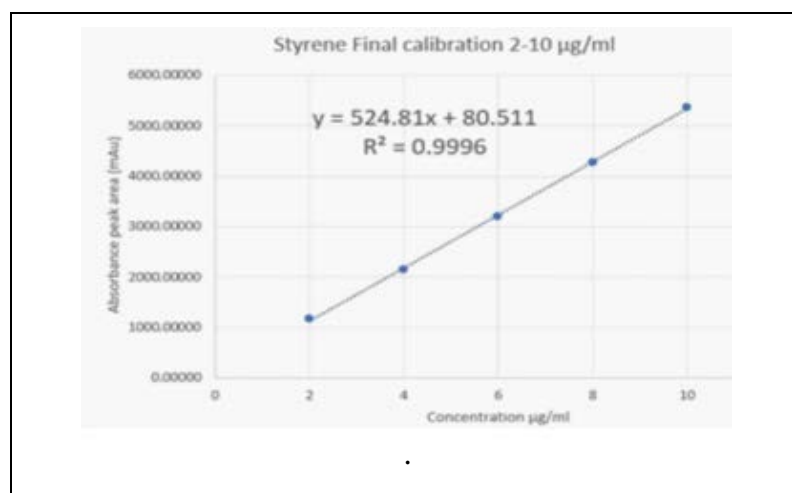

Figure S4. Calibration curve for styrene 2–10µg/mL.

Selective HPLC are presented below. The peak eluting in minutes being represented on the X-axis and the peak areas represented in *mAU* on the Y-axis).

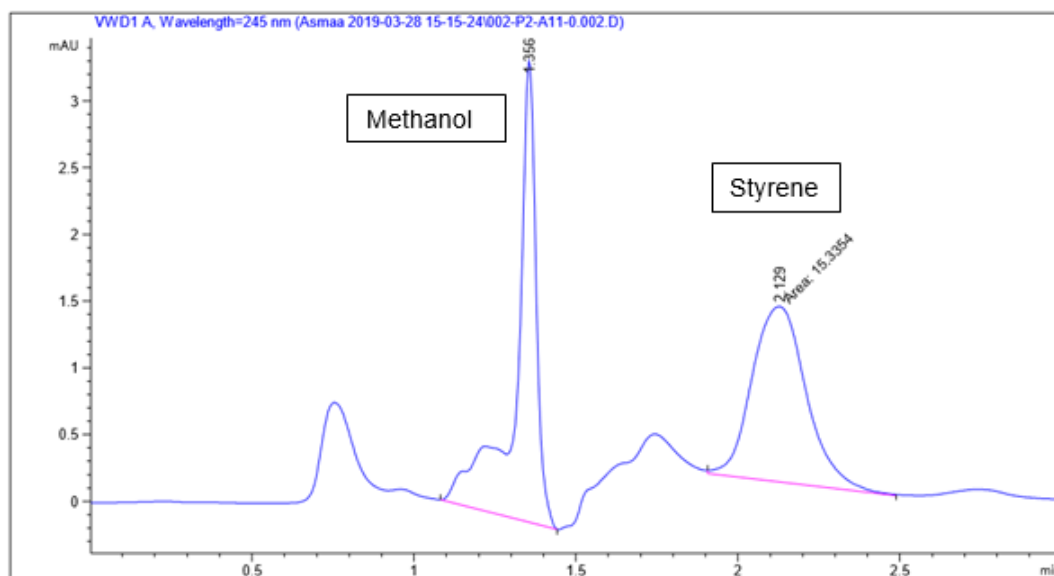

Figure S5. Chromatogram of a standard styrene solution with concentration 0.8 µg/mL.

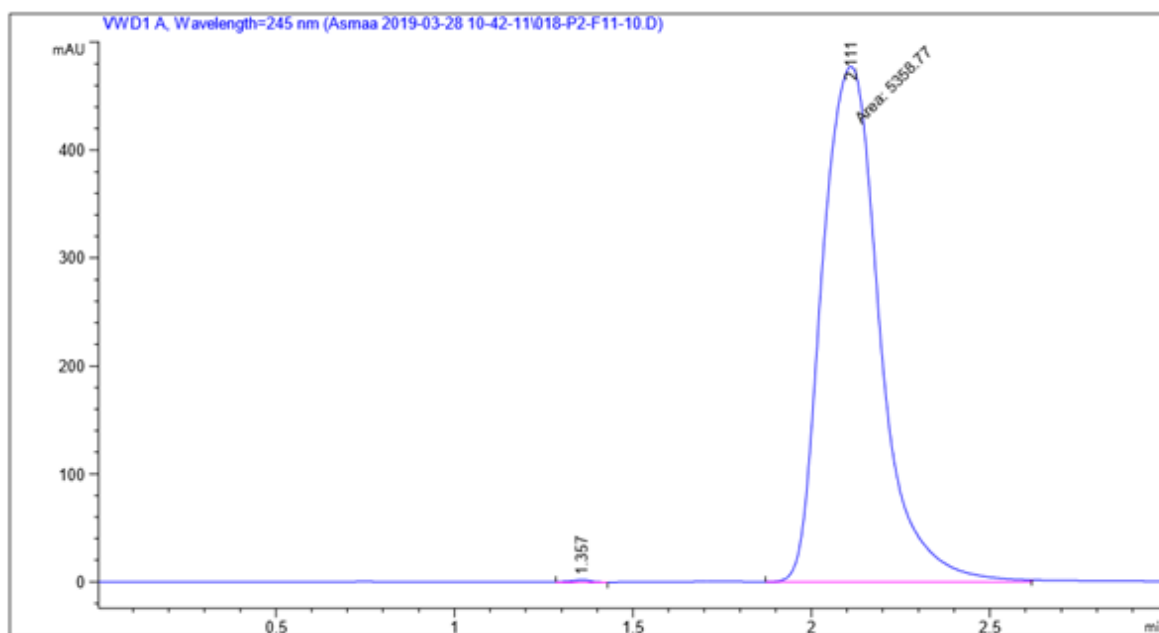

Figure S6. Chromatogram of a standard styrene solution with concentration 10 µg/mL.

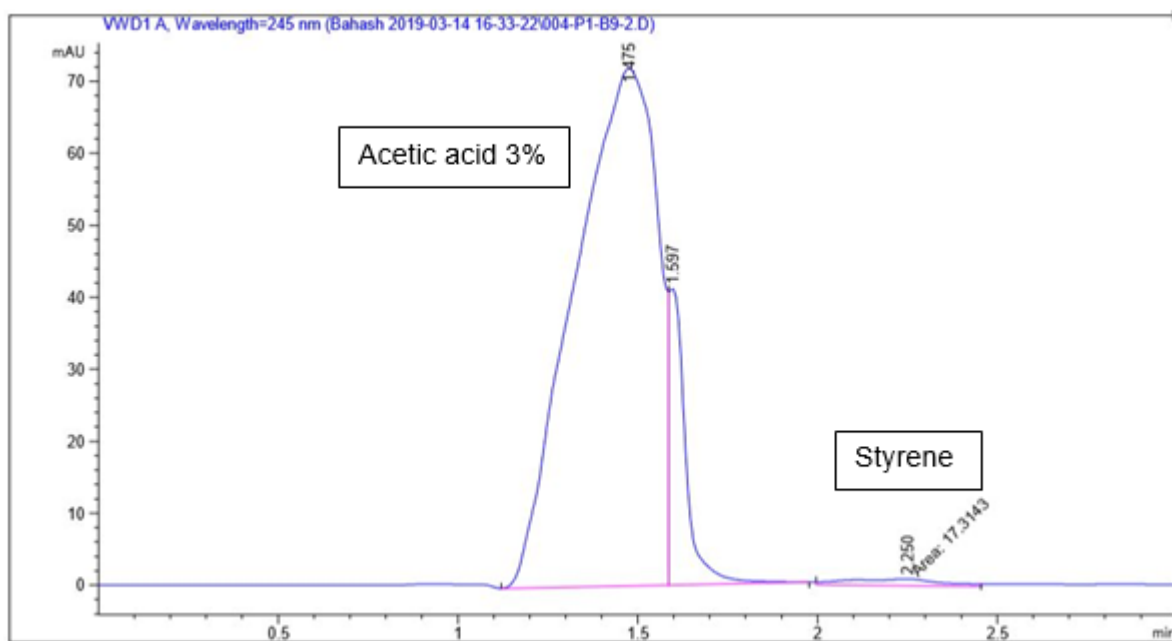

Figure S7: HPLC Migration of styrene in 3% acetic acid for 2 hours at 70 °C.

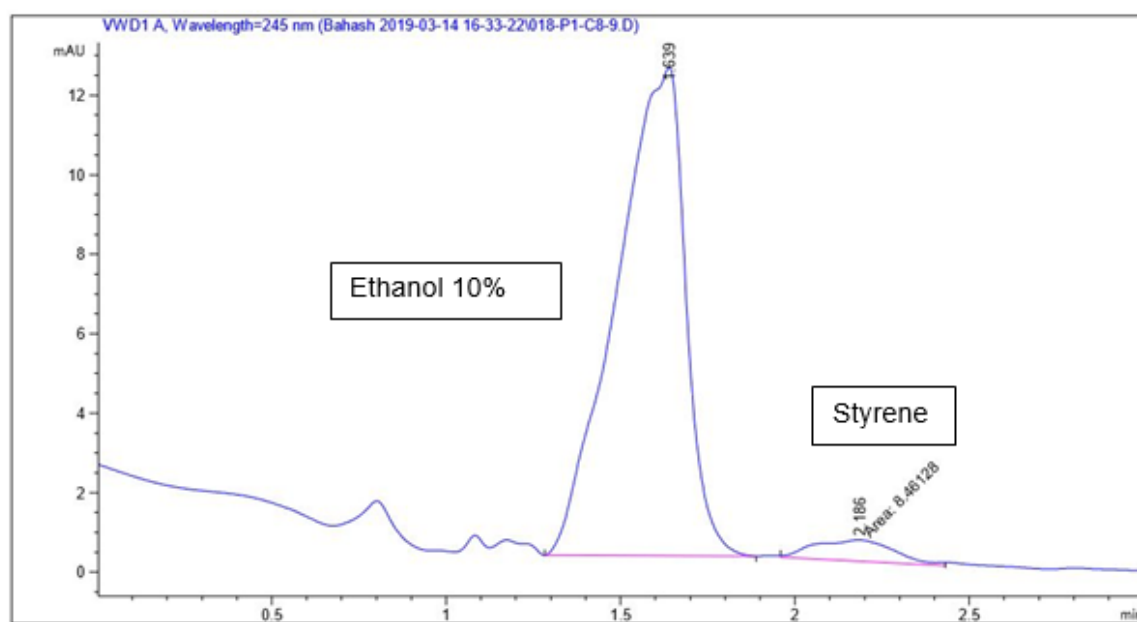

Figure S8: HPLC Migration of styrene in 10% ethanol for 240hours at 5 °C

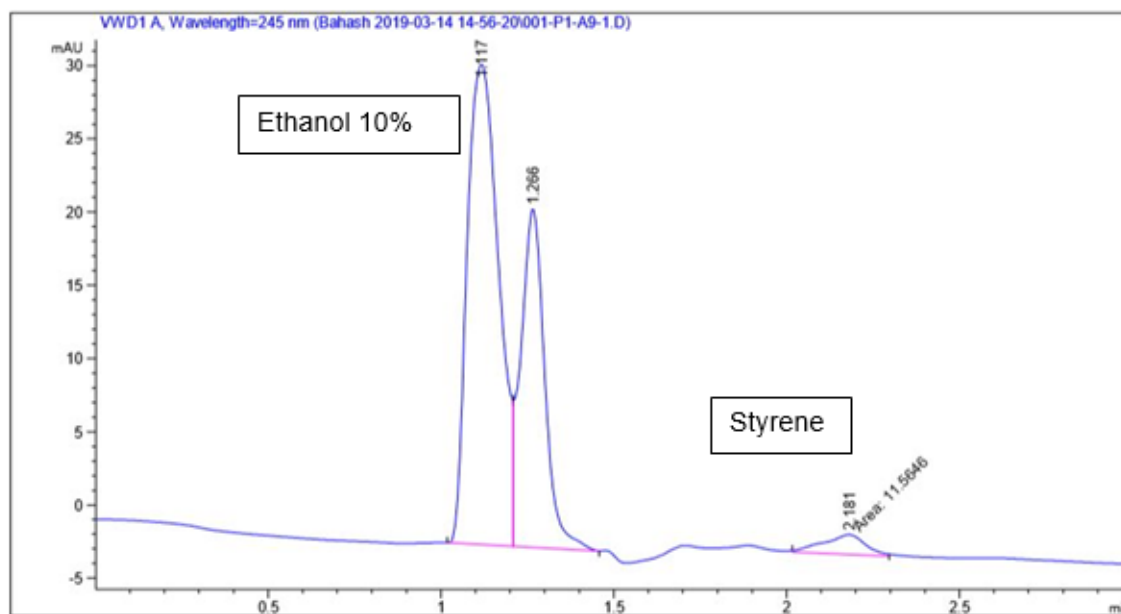

Figure S9: HPLC Migration of styrene in 10% ethanol for 2 hours at 70 °C.

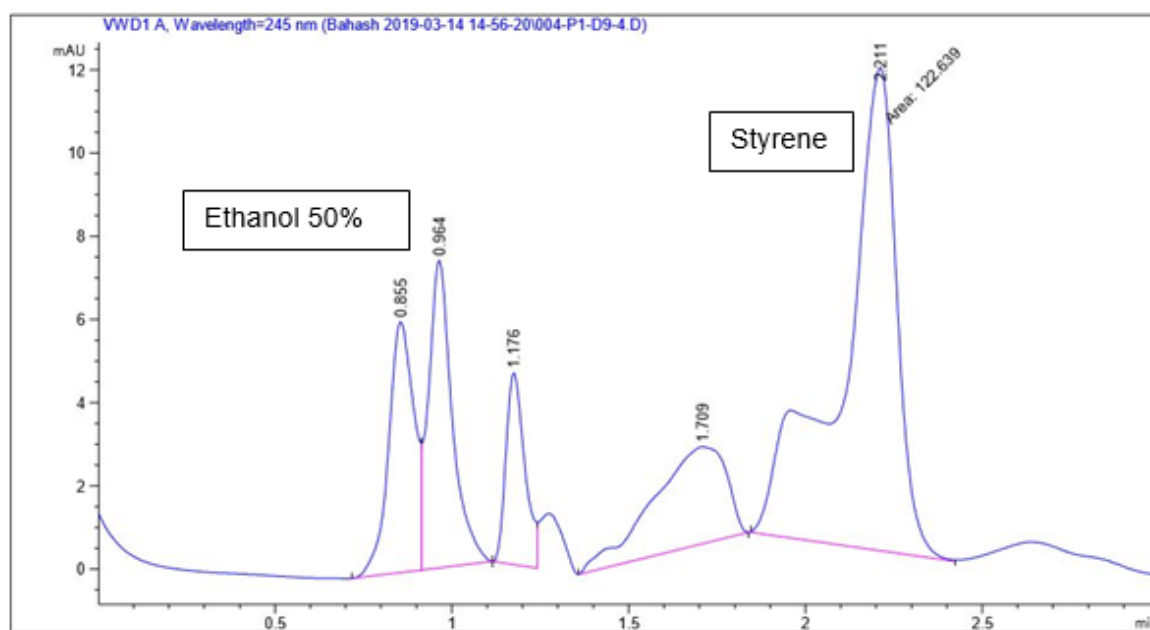

Figure S10: HPLC Migration of styrene in 50% ethanol for 2 hours at 70 °C.

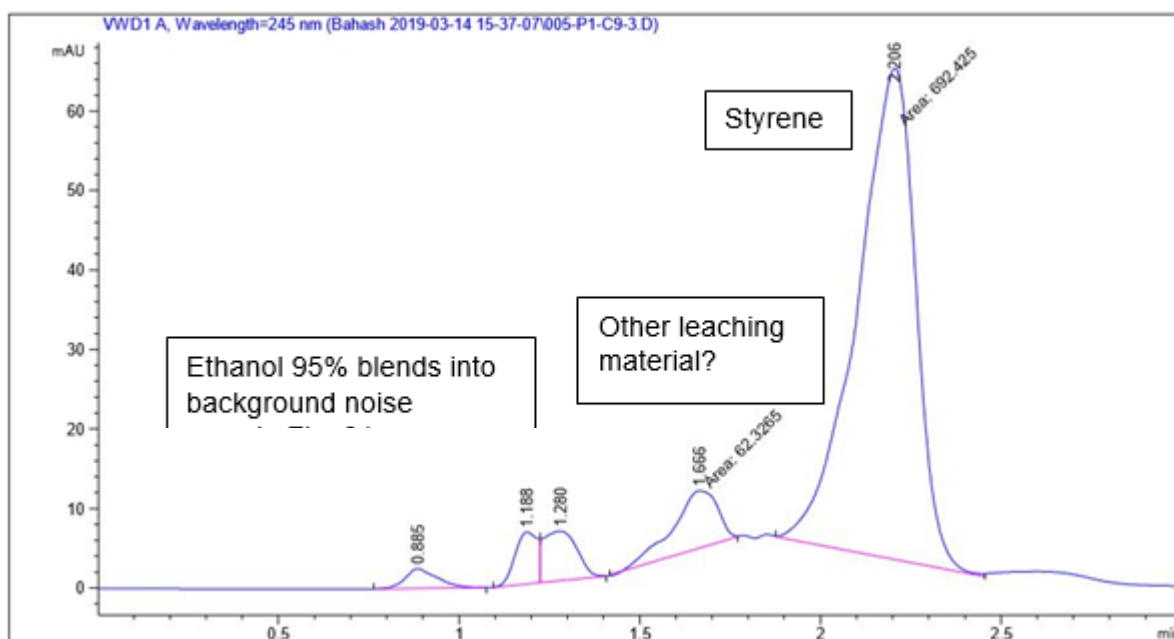

Figure S11: HPLC Migration of styrene in 95% ethanol for 2 hours at 70 °C.
